# Supplementary material for: Combining Quantitative Genetic Footprinting and Trait Enrichment Analysis to Identify Fitness Determinants of a Bacterial Pathogen
Source: PubMed Central journal article supplement (PMC3749937; doi:10.1371/journal.pgen.1003716), 2013-08-22

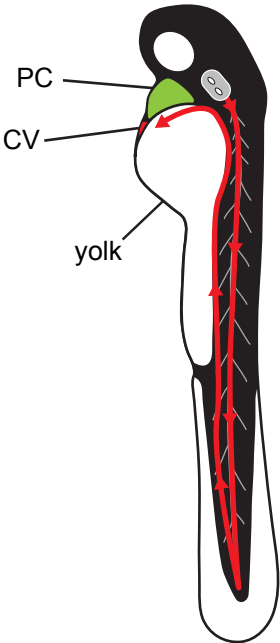

Supplement: pgen.1003716.s003.pdf [file pgen.1003716.s003.pdf]
