# Supplementary material for: Combining Quantitative Genetic Footprinting and Trait Enrichment Analysis to Identify Fitness Determinants of a Bacterial Pathogen
Source: PubMed Central journal article supplement (PMC3749937; doi:10.1371/journal.pgen.1003716), 2013-08-22
Supplement: pgen.1003716.s007.pdf [file pgen.1003716.s007.pdf]

**A****Habitat**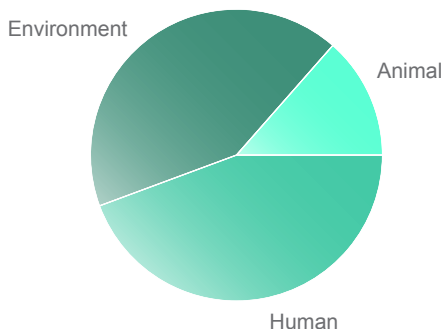**B****Niche**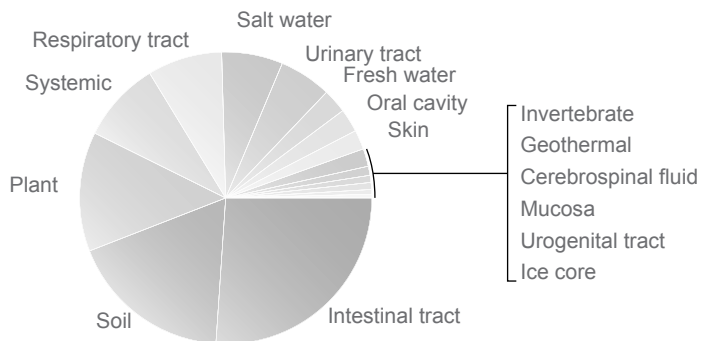**C****Phylum**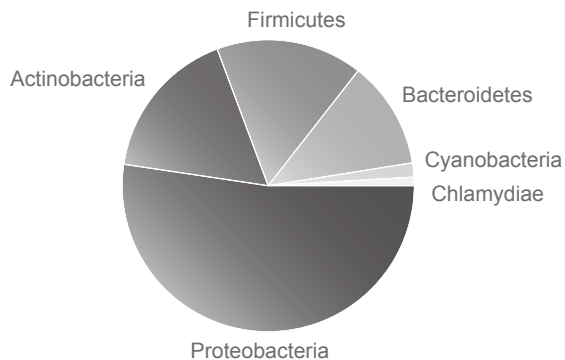**D****Phenotype**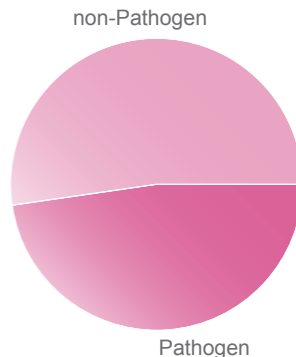**E**

| Habitat     | total genomes | total proteins |
|-------------|---------------|----------------|
| Animal      | 26            | 83,103         |
| Environment | 59            | 258,787        |
| Human       | 80            | 272,437        |

| Niche               | total genomes | total proteins |
|---------------------|---------------|----------------|
| Ice core            | 1             | 2,534          |
| Urogenital tract    | 2             | 3,172          |
| Mucosa              | 4             | 4,753          |
| Cerebrospinal fluid | 1             | 4,827          |
| Geothermal          | 2             | 6,178          |
| Invertebrate        | 5             | 12,071         |
| Skin                | 4             | 13,236         |
| Oral cavity         | 8             | 15,903         |
| Fresh water         | 4             | 16,455         |
| Urinary tract       | 8             | 35,554         |
| Salt Water          | 12            | 41,606         |
| Respiratory tract   | 14            | 50,777         |
| Systemic            | 19            | 55,106         |
| Plant               | 17            | 81,255         |

| Niche <i>continued</i> | total genomes | total proteins |
|------------------------|---------------|----------------|
| Soil                   | 23            | 110,759        |
| Intestinal tract       | 41            | 160,141        |

| Phylum         | total genomes | total proteins |
|----------------|---------------|----------------|
| Chlamydiae     | 5             | 5,822          |
| Cyanobacteria  | 4             | 9,596          |
| Bacteroidetes  | 22            | 73,311         |
| Firmicutes     | 30            | 99,767         |
| Actinobacteria | 26            | 104,210        |
| Proteobacteria | 78            | 321,621        |

| Phenotype    | total genomes | total proteins |
|--------------|---------------|----------------|
| non-Pathogen | 81            | 321,251        |
| Pathogen     | 84            | 293,076        |
