# Supplementary material for: Combining Quantitative Genetic Footprinting and Trait Enrichment Analysis to Identify Fitness Determinants of a Bacterial Pathogen
Source: PubMed Central journal article supplement (PMC3749937; doi:10.1371/journal.pgen.1003716), 2013-08-22
Supplement: pgen.1003716.s009.pdf [file pgen.1003716.s009.pdf]

**A**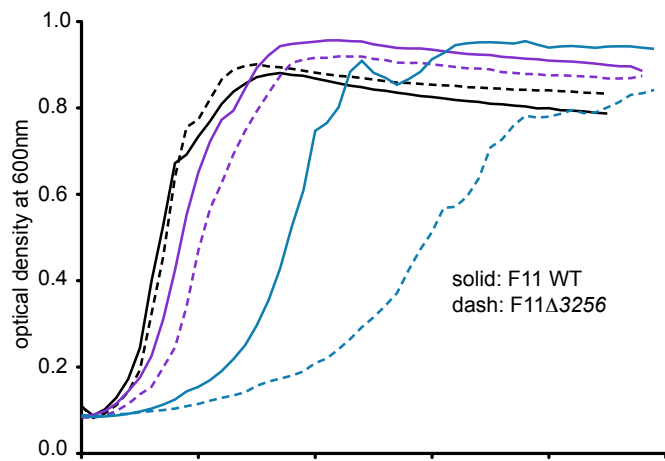**B**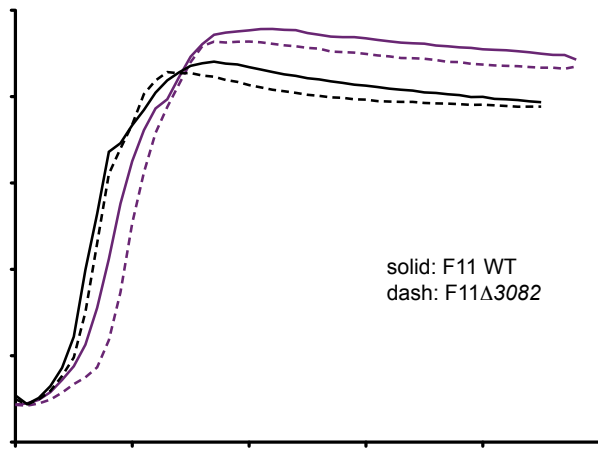**C**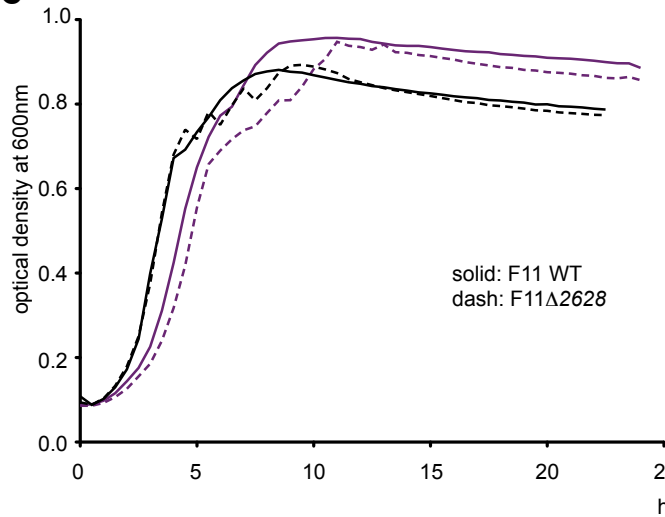**D**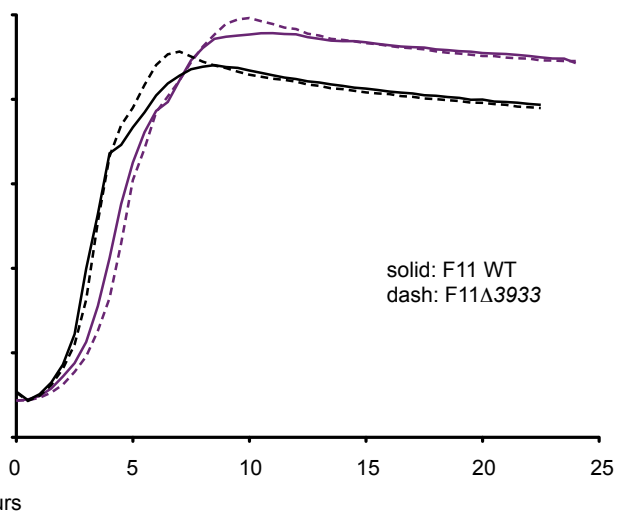

■ 37°C

■ 28.5°C

■ 20°C
