# Supplementary material for: Combining Quantitative Genetic Footprinting and Trait Enrichment Analysis to Identify Fitness Determinants of a Bacterial Pathogen
Source: PubMed Central journal article supplement (PMC3749937; doi:10.1371/journal.pgen.1003716), 2013-08-22
Supplement: pgen.1003716.s011.pdf [file pgen.1003716.s011.pdf]

**Table S1.** General sequence-based features of input and output pools

| Replicate<br>CFU/embryo | Pool  | Detected mutant variants | Depth<br>Sum of aligned reads | Saturation                                       |                | Insertional bias<br>% of inserts within annotated loci** |
|-------------------------|-------|--------------------------|-------------------------------|--------------------------------------------------|----------------|----------------------------------------------------------|
|                         |       |                          |                               | % of annotated genes with at least:<br>1 insert* | 10 insertions* |                                                          |
| 1 (2,000)               | Input | 78,591                   | 8,206,447                     | 99.90                                            | 98.96          | 87.83                                                    |
|                         | Blood | 23,756                   | 7,075,904                     | 95.07                                            | 48.85          | 88.08                                                    |
|                         | PC    | 38,936                   | 7,671,459                     | 98.08                                            | 72.14          | 88.01                                                    |
| 2 (3,000)               | Input | 81,096                   | 8,494,073                     | 99.77                                            | 98.92          | 87.84                                                    |
|                         | Blood | 31,871                   | 7,049,106                     | 96.20                                            | 60.67          | 88.22                                                    |
|                         | PC    | 38,842                   | 9,052,580                     | 97.55                                            | 70.20          | 88.42                                                    |
| 3 (4,000)               | Input | 63,184                   | 8,113,311                     | 99.54                                            | 99.00          | 88.17                                                    |
|                         | Blood | 31,927                   | 5,899,109                     | 96.69                                            | 62.41          | 87.78                                                    |
|                         | PC    | 44,926                   | 7,309,071                     | 97.93                                            | 73.21          | 88.07                                                    |

\*values reflect proportion of 5,312 annotated regions within the F11 genome.

\*\*4,628,529 bp (out of 5,215,961 bp) are contained within annotated F11 loci; therefore, it is expected that the percent of inserts found within annotated regions would be 88.73%.
