# Supplementary material for: Combining Quantitative Genetic Footprinting and Trait Enrichment Analysis to Identify Fitness Determinants of a Bacterial Pathogen
Source: PubMed Central journal article supplement (PMC3749937; doi:10.1371/journal.pgen.1003716), 2013-08-22
Supplement: pgen.1003716.s014.pdf [file pgen.1003716.s014.pdf]

**Table S4.** Composition of TEA-defined pathogen-associated genes within Tn-seq gene sets.

| <b>Gene Set</b> (total genes) | <b>observed</b> (% of gene set) | <b>theoretical</b> | <b>p value</b> |
|-------------------------------|---------------------------------|--------------------|----------------|
| F11 genome (5,148)            | 1,166 (22.65)                   | -                  | -              |
| Hypo-tolerant (609)           | 120 (19.70)                     | 127.84             | 0.803          |
| Hyper-tolerant (431)          | 81 (18.79)                      | 91.06              | 0.899          |
| ■ <i>in piscis</i> (970)      | 246 (25.36)                     | 218.11             | 0.009          |
| Multi-niche (76)              | 15 (19.74)                      | 17.31              | 0.786          |
| ■ PC (122)                    | 39 (31.97)                      | 27.52              | 0.008          |
| ■ Blood (772)                 | 192 (24.87)                     | 173.54             | 0.0485         |
| ■ Advantageous (227)          | 69 (30.39)                      | 50.46              | 0.004          |

Significant enrichment of pathogen-associated genes within Tn-seq gene sets was detected using 1,000 Monte Carlo simulations. For the 'Blood' gene set, 10,000 simulations were performed to generate a more discernable *p* value. Significant enrichments ( $p < 0.05$ ) are marked with a blue box.
