# Supplementary material for: Combining Quantitative Genetic Footprinting and Trait Enrichment Analysis to Identify Fitness Determinants of a Bacterial Pathogen
Source: PubMed Central journal article supplement (PMC3749937; doi:10.1371/journal.pgen.1003716), 2013-08-22
Supplement: pgen.1003716.s015.pdf [file pgen.1003716.s015.pdf]

**Table S5.** Bacterial strains and plasmids.

| Strain or Plasmid   | Description                                                                                                                                                                                   | Reference/Source |
|---------------------|-----------------------------------------------------------------------------------------------------------------------------------------------------------------------------------------------|------------------|
| <i>E. coli</i>      |                                                                                                                                                                                               |                  |
| F11                 | ExPEC (human cystitis isolate, O6:K2:H31)                                                                                                                                                     | [1,2]            |
| EcS17               | <i>pir</i> <sup>+</sup> donor strain                                                                                                                                                          | [3,4]            |
| Plasmids            |                                                                                                                                                                                               |                  |
| pKM208              | Encodes IPTG-inducible lambda Red recombinase; Amp <sup>r</sup>                                                                                                                               | [5]              |
| pKD4                | Template source for kanamycin resistance cassette; Kan <sup>r</sup>                                                                                                                           | [6]              |
| pGFP-Mut3.1         | Source vector for P <sub>lac</sub> promoter; Amp <sup>r</sup>                                                                                                                                 | Clontech         |
| pSAM_Bt             | Source plasmid for construction of pSAM-Ec; Amp <sup>r</sup> , Erm <sup>r</sup>                                                                                                               | [4]              |
| pSAM-Ec             | Contains the <i>himar1C9</i> transposase gene driven by a P <sub>lac</sub> promoter and a <i>mariner</i> transposon encoding a kanamycin resistance gene; Amp <sup>r</sup> , Kan <sup>r</sup> | This study       |
| Recombinant strains |                                                                                                                                                                                               |                  |
| F11/pKM208          | F11 with pKM208; Amp <sup>r</sup>                                                                                                                                                             | This study       |
| F11Δ3256            | F11 <i>EcF11_3256 (typA/bipA)::kan</i> ; Kan <sup>r</sup>                                                                                                                                     | This study       |
| F11Δ3082            | F11 <i>EcF11_3082 (mprA/emrR)::kan</i> ; Kan <sup>r</sup>                                                                                                                                     | This study       |
| F11Δ2628            | F11 <i>EcF11_2628</i> (hypothetical):: <i>kan</i> ; Kan <sup>r</sup>                                                                                                                          | This study       |
| F11Δ3933            | F11 <i>EcF11_3933</i> (hypothetical):: <i>kan</i> ; Kan <sup>r</sup>                                                                                                                          | This study       |

## References

- Lloyd AL, Rasko DA, Mobley HL (2007) Defining genomic islands and uropathogen-specific genes in uropathogenic *Escherichia coli*. *Journal of bacteriology* 189: 3532-3546.
- Wiles TJ, Bower JM, Redd MJ, Mulvey MA (2009) Use of zebrafish to probe the divergent virulence potentials and toxin requirements of extraintestinal pathogenic *Escherichia coli*. *PLoS pathogens* 5: e1000697.
- Cowles CE, Nichols NN, Harwood CS (2000) BenR, a XylS homologue, regulates three different pathways of aromatic acid degradation in *Pseudomonas putida*. *Journal of bacteriology* 182: 6339-6346.
- Goodman AL, McNulty NP, Zhao Y, Leip D, Mitra RD, et al. (2009) Identifying genetic determinants needed to establish a human gut symbiont in its habitat. *Cell host & microbe* 6: 279-289.
- Murphy KC, Campellone KG (2003) Lambda Red-mediated recombinogenic engineering of enterohemorrhagic and enteropathogenic *E. coli*. *BMC molecular biology* 4: 11.
- Datsenko KA, Wanner BL (2000) One-step inactivation of chromosomal genes in *Escherichia coli* K-12 using PCR products. *Proceedings of the National Academy of Sciences of the United States of America* 97: 6640-6645.
