# Supplementary material for: Combining Quantitative Genetic Footprinting and Trait Enrichment Analysis to Identify Fitness Determinants of a Bacterial Pathogen
Source: PubMed Central journal article supplement (PMC3749937; doi:10.1371/journal.pgen.1003716), 2013-08-22
Supplement: pgen.1003716.s016.pdf [file pgen.1003716.s016.pdf]

**Table S6.** Primers used in this study.

| Primer Use/Name                     | Sequence 5'-3'                                                 |
|-------------------------------------|----------------------------------------------------------------|
| <b>Cloning</b>                      |                                                                |
| <i>P<sub>lac</sub></i> promoter     |                                                                |
| <i>P<sub>lac</sub>_BamHI_Foward</i> | GTAGGATCCAGTGAGCGCAACGCAATTA                                   |
| <i>P<sub>lac</sub>_NdeI_Reverse</i> | GTACATATGTATCCGCTCACAATTCCACA                                  |
| Kanamycin <sup>r</sup> cassette     |                                                                |
| <i>Kan_MfeI_Foward</i>              | TCGCAATTGAGGAAGCGGAACACGTAGAA                                  |
| <i>Kan_XbaI_Reverse</i>             | TCGTCTAGAGTCATTTTCGAACCCCAGAGTC                                |
| pSAM promoter sequencing            |                                                                |
| -69_Foward                          | TGGCCTTTTTGCGTTTTCTAC                                          |
| +65_Reverse                         | CAAGCCAAGTTTTTGCTTCC                                           |
| <b>Southern blot probe</b>          |                                                                |
| Kanamycin gene                      |                                                                |
| <i>SB_probe_Foward</i>              | AGGAAGCGGAACACGTAGAA                                           |
| <i>SB_probe_Reverse</i>             | CTCGTCCTGCAGTTCATTCA                                           |
| <b>Knockout and confirmation</b>    |                                                                |
| <i>EcF11_3256</i> KO                |                                                                |
| Forward                             | TGTACAATAACGCGCTATTTCTAATGCCTGAGGCAAAGTTTGTGTAGGCTGGAGCTGCTTCG |
| Reverse                             | CTGCCATCGCTGGCAGGTTTTTTATGACTAAAAAACGAAACATATGAATATCCTCCTTAG   |
| <i>EcF11_3256</i> KO confirm        |                                                                |
| Forward                             | CAATACTTGTTTGCGGAGGA                                           |
| Reverse                             | GGGAGATACTCGCATTGGTG                                           |
| <i>EcF11_3082</i> KO                |                                                                |
| Forward                             | TCGTTACTATATCGGCTGAAATTAATGAGGTCATACCCAATGTGTAGGCTGGAGCTGCTTCG |
| Reverse                             | TTTTCTTTTATAAATCTGGATTTTTGAGCGAGATGACGCGCATATGAATATCCTCCTTAG   |
| <i>EcF11_3082</i> KO confirm        |                                                                |
| Forward                             | TCGGCTGAAATTAATGAGGTC                                          |
| Reverse                             | CCAAAAAGGCCAGCATGT                                             |
| <i>EcF11_2628</i> KO                |                                                                |
| Forward                             | TAGCTCTACCACGTATTTTTTTTCTAAACATTATCTACCTTGTGTAGGCTGGAGCTGCTTCG |
| Reverse                             | TATTCCTAATATGGCAACTTTAAGTTATCGCCGTCATACCATATGAATATCCTCCTTAG    |
| <i>EcF11_2628</i> KO confirm        |                                                                |
| Forward                             | CAGGATTTTTGCTAACATAACCTT                                       |
| Reverse                             | GGCGCACCGTGTCTTTTC                                             |
| <i>EcF11_3933</i> KO                |                                                                |
| Forward                             | TTTATCCTCTTGCCCTTGCTTCTACCTCGGTAAAAAATGTGTGTAGGCTGGAGCTGCTTCG  |
| Reverse                             | AAACAGGTGTTGCACACAACCAGACGCGGCACCTGTTTTACATATGAATATCCTCCTTAG   |
| <i>EcF11_3933</i> KO confirm        |                                                                |
| Forward                             | GCATGGACGCTGACAGTTC                                            |
| Reverse                             | TGTGGATGAAGGGTAAGGT                                            |
