# Supplementary material for: Combining Quantitative Genetic Footprinting and Trait Enrichment Analysis to Identify Fitness Determinants of a Bacterial Pathogen
Source: PubMed Central journal article supplement (PMC3749937; doi:10.1371/journal.pgen.1003716), 2013-08-22
Supplement: pgen.1003716.s018.pdf [file pgen.1003716.s018.pdf]

**Table S8.** TEA-assigned trait identities for known bacterial virulence factors and conserved genes involved in basic bacterial physiology.

|                 | protein | function                  | F11 Locus_Tag | number of TEA-MD bacteria with homologues (% pathogens) | significance of pathogen association ( $p$ value) |
|-----------------|---------|---------------------------|---------------|---------------------------------------------------------|---------------------------------------------------|
| virulence genes | FyuA    | iron acquisition          | EcF11_3031    | 36 (69.4)                                               | 0.010                                             |
|                 | FepA    | iron acquisition          | EcF11_0158    | 51 (62.7)                                               | 0.029                                             |
|                 | HlyA    | toxin                     | EcF11_0729    | 8 (100)                                                 | 0.002                                             |
|                 | VasA    | type VI secretion         | EcF11_3189    | 39 (71.7)                                               | 0.003                                             |
|                 | ClpV    | type VI secretion         | EcF11_3195    | 40 (65)                                                 | 0.024                                             |
|                 | PapG    | adhesion                  | EcF11_0768    | 8 (100)                                                 | 0.004                                             |
|                 | Tsh     | adhesion                  | EcF11_3654    | 15 (93.3)                                               | <0.001                                            |
|                 | KpsC    | capsule                   | EcF11_1397    | 17 (82.3)                                               | 0.007                                             |
| conserved genes | FimH    | adhesion                  | EcF11_0633    | 29 (62)                                                 | 0.145                                             |
|                 | Crp     | carbon utilization        | EcF11_4019    | 102 (46)                                                | 0.952                                             |
|                 | BipA    | translation               | EcF11_3256    | 159 (50.9)                                              | 0.620                                             |
|                 | LrhA    | transcriptional           | EcF11_1255    | 70 (52.8)                                               | 0.387                                             |
|                 | CheY    | chemotaxis                | EcF11_4121    | 69 (53.6)                                               | 0.334                                             |
|                 | OmpR    | osmoregulation            | EcF11_3975    | 85 (51.7)                                               | 0.477                                             |
|                 | OxyR    | oxidative stress response | EcF11_2992    | 112 (51.7)                                              | 0.422                                             |
|                 | RpoE    | envelope stress response  | EcF11_4796    | 113 (48.6)                                              | 0.840                                             |
